# Supplementary material for: Early-warning of trends in commercial wildlife trade through novel machine-learning analysis of patent filing
Source: Research Square preprint supplement (doi:10.21203/rs.3.rs-3369832/v1), 2023-09-26
Supplement: Supplementary file 1 [file a5259c67d33244b9e58a46d9.docx]

# Material and methods

**Identifying and refining case studies**

We identified a long-list of wild-type taxa (whether wild-sourced or farmed), traded commercially in more than one country, which had been subject to regulatory or non-regulatory measures designed to change trade in some way. Long-listed taxa were pangolins, bears, rhinos, freshwater turtles, crocodiles, snowdrops, horseshoe crabs, devil’s claw plants, caterpillar fungus, and sharks. We then produced a final shortlist of taxa that covered a variety of trade purposes and trade control measures: bears traded primarily for their bile used in medicine (family Ursidae); caterpillar fungus used in medicine and health products (genera *Cordyceps* and *Ophiocordyceps*); horseshoe crabs (family Limulidae); pangolins used in medicine and for food in different regions (family Manidae); rhinos traded primarily for their horn, used in medicine or ornamentally (family Rhinocerotidae); and sturgeon primarily traded for their caviar for the food trade (family Acipenseridae). These include cases where commercial trade is restricted to regional markets (e.g., bear bile traded primarily for traditional medicines in China and Southeast Asian countries), as well as those with global markets (e.g., horseshoe crab blood harvested and traded worldwide for the biomedical pharmaceutical industry). We selected three examples which are subject to international commercial trade bans for all species (bears, rhinos, pangolins), as well as national-level restrictions on wild harvest and trade in all or most range states. In addition, we selected three examples with local and national restrictions on harvest, which differ between range states and species (sturgeon, caterpillar fungus, horseshoe crab). Four of our examples have a current legal commercial trade in farmed or synthetic alternatives (bear, horseshoe crab, sturgeon, caterpillar fungus). All examples have shown some change in their regulation, or the commercial availability of alternative products in our study period.

**Selecting keywords**

Patent applications must provide detailed information on the component parts or processes of an innovation, background information on the context in which it could be used, or what it is designed to replace. Our focus was on patenting for products that contained parts of our focal taxa, or methods designed specifically to change the production or processing of these products. We therefore assumed, based on previous studies (Masters et al. 2020), that the taxa binomial or common name would be included in relevant patents, even those for products designed to act as an alternative to the wild products (e.g., a bear bile replacement made from chicken bile). We therefore identified initial keywords related to the Latin binomial or common name of each product in English, and in any key languages relevant to the primary areas of trade or consumption (e.g., ‘pangolin’, ‘Manis’ and the Chinese pinyin translation ‘chuan shan jia’). We used these keywords to scrape the Google patents database and then randomly selected 200 patents from the results, which <redacted> used to manually check and refine keywords. This involved identifying patents containing those keywords that were not relevant to our case studies (e.g., ‘pangolin’ is used as a term in *Drosophila* genetic research, meaning that multiple patents containing this word were not focused on pangolins), and identifying any keywords associated with relevant patents that we had not included. We also excluded certain keywords that, whilst accurate, did not uniquely match a significant number of patents and also led either to translation errors or high rates of false positives (Table 3).

**Table S1** Final keywords used to scrape the Google Patents database for patents related to our focal taxa

| **Taxa** | **Keywords** | **Notes** |
| --- | --- | --- |
| Bear | 'bear bile', 'bear farm', bear 'gall bladder', bear 'gall powder', bear gallbladder, 'fel ursi', ‘ursodeoxycholic’, 'ursus arctos', 'ursus thibetanus', ‘xiongdan’, ‘熊胆’  **NOT** ‘ma huang jia zhu tang’ | Our keywords focussed on bear bile as the key product in trade because general keywords, such as ‘bear’ resulted in a lot of false positives. Ma huang jia zhu tang was sometimes mistranslated as ‘bear grass’. |
| Caterpillar fungus | ‘cordyceps’, ‘caterpillar fungus’, ‘aweto’, ‘dongchongxiacao’, ‘dong chong xia cao’ | Other names for Cordyceps (e.g., Yarsagumba) did not uniquely match any patents. |
| Horseshoe Crab | 'horseshoe crab', polyphemus, 'tachypleus tridentatus', 'tachypleus gigas', 'carcinoscorpius rotundicauda', limulus  **NOT** ‘soft-shell’ | Some patents for soft-shell crabs were mistranslated as ‘soft-shell horseshoe crab’ |
| Pangolin | ‘pangolin’, ‘squama manis’, ‘jia zhu’, ‘pao shan jia’, 'chuan shan jia', ‘squama manitis’, ‘穿山甲’, ‘醋山甲’  **NOT** ‘drosophila’ | *Pangolin* is the common name of a fruit fly gene and occurs frequently in *Drosophila* genetic research. |
| Rhinoceros | ‘rhinoceros’, ‘rhino’, ‘diceros’, ‘ceratotherium’, ‘dicerorhinus’  **NOT** ‘rhinoceros beetle’, ‘orcytes’, ‘polyporus rhinoceros’, ‘giraffe rhinoceros’, ‘game’, ‘toy’, ‘software’ | *Oryctes rhinoceros* and other rhinoceros beetles are a common agricultural pest. Many patents for rhino were games or toys with rhino characters. |
| Sturgeon | ‘sturgeon’, ‘acipenser’ | Other sturgeon genera names (e.g., *Huso*) were not found independently in the patents data, and inclusion led to high rates of translation errors. |

**Patent Scraping**

To assess the growth and development of commercial interest in wildlife-derived products, and in particular to identify emerging topics and concepts, we used large-scale analysis of patent filing data. Patents represent the leading edge of technological development by corporations seeking to dominate and drive an industry, responding to perceived or identified needs in the marketplace. As patent filing is necessarily public, patent data provides a convenient and open data source by which to study emerging trends in a range of industries as well as the key concerns that are present in the text of existing patent filing behaviour.

To understand the landscape of patenting of wildlife-derived products, we scraped public patent data via the Google Patents search engine. This tool allows keyword-based search in the text and metadata of patents, with search terms automatically translated into multiple languages. We used the open-source browser automation library selenium, and specifically its R interface rselenium 40 to obtain a full list of patents matching a range of identified search terms of interest for given taxa.

The resulting full list of patents returned by the Google Patents search engine was then used to scrape patent text directly. This resulted in a dataset of all filed patents matching the provided search terms, including the names of the filing entities, the patent authors, the dates of first filing of a patent (‘priority date’), the text of the patent abstract, and the full description of the associated invention. For our initial set of search terms, the total dataset comprised <x> patents across <y> search terms for <z> taxa.

Once downloaded, the patent data was subjected to initial filtering and processing to remove duplicate patents and irrelevant confounding search terms. Due to the nature of the data, it is difficult *a priori* to ensure that search terms do not produce spurious irrelevant results, and manual filtering to validate the downloaded data is required.

With a scraped and filtered dataset, we first identified the trends in the patent filing rate over time. To calculate the mean increase in patent-filing rate for the global patents across all sectors and our focal taxa, we started in 1985, the first year for which every taxon has had at least one patent filed and finished in December 2020. We calculated the year-on-year percentage change (January-December). Ignoring any years that had zero patents, we calculated the mean % change in patent filing across all years.

*Filing frequency changepoint analysis*

A key area of interest in patent filing behaviour is the rate at which patents for a given technology are filed. More specifically, we were interested in moments at which a *changepoint* occurs in patent filing, representing a significant shift in the underlying rate at which corporations file patents relating to a given concept.

We conducted a Bayesian changepoint analysis 41 on the rate of monthly patent filing for a given set of patent search results. This approach models the rate of patent filing in each month as drawn from a probability distribution, specifically a negative binomial distribution allowing for flexible description of count data. To identify a changepoint, we allowed the data to be described by two separate parameterisations of a negative binomial distribution – one prior to a potential changepoint, and one after. The changepoint is identified as a parameter describing a time point at which the two separate instantiations of the negative binomial model the observed data optimally.

We fitted the changepoint model using the Stan probabilistic programming language 42, through its R interface cmdstanr. The Bayesian changepoint provides not only a point estimate of the changepoint, but a probability distribution across potential changepoints, allowing us to easily assess the uncertainty in the models. While the approach taken here focuses on a single changepoint, it is possible to segment the dataset at identified changepoints to identify subsequent changepoints of interest.

For this work, we focused on identifying a key changepoint in the model, which is presented alongside a timeline of identified key real-world events relevant to legislation, regulation, or public attention drawn to a given taxon. While this approach cannot draw causative inferences between observed patent filing behaviour and exogenous events, it places shifts in patent filing in their surrounding social, technological, and political context.

*Topic modelling*

The changepoint analysis serves to identify the timeframe of key shifts in patent behaviour but does not interrogate the content of the patents. Latent Dirichlet Allocation (LDA) topic modelling is a widely used natural language processing (NLP) technique applied to identify commonly co-occurring themes in a large corpus of data. Topic modelling treats each document in a corpus as resulting from an underlying probability distribution of words, and splits the corpus into a defined number of separate ‘topic’ probability distributions. Each document can then be classified according to the given topic distribution that best describes its content.

The result of applying this approach is that a large corpus of documents can be automatically classified into sets of related documents, according to the key terms that appear in them. The characteristic terms for each topic, then, can be identified to allow human-identified semantic understanding of the classifications. In this sense, topic modelling as an unsupervised machine learning technique is best considered an automated aid allowing large-scale human guided classification and understanding of large corpora of documents.

For the purposes of this analysis, topic modelling allowed us not only to classify related documents together, but to identify key themes and terms that run through the patent filing dataset, and to determine whether certain terms are emerging, growing, or falling in popularity. In the analysis presented here, we focus on the text of patent abstracts, rather than the full description text, as this provides a more focused view of the major themes of a patent, rather than the detailed technical description that is found in the full description text.

*Thematic coding for manual topic identification*

We used the topics identified during the LDA topic modelling phase, combined with a codebook based on the Economic Botany Data Collection Standard (<https://www.tdwg.org/standards/economic-botany/>) to define broad topics and more specific subcategories related either to the use of the species in a novel product (medicine, food, agriculture, cosmetics) or to an innovative process associated with the trade of the taxa (production [e.g. farming, cultivation], preparation [e.g. extraction of active ingredients], detection [e.g. genetic differentiation of similar species]).

We defined keywords for each topic using the first five non-generic terms of each LDA-identified topic, and keywords associated with the Economic Botany standards (e.g., ‘disorders’ or ‘pain’ to cover various medical applications). We then labelled all patents containing these keywords as belonging to at least one topic; a patent could be labelled as relating to two topics if, for example, it related to a new medicinal product (‘medicine’) using a synthetic version of the wild taxa (‘synthetic alternative’). We then used an iterative process, where we manually reviewed all labelled and unlabelled patents to identify missing keywords relating to our existing topics, identify new topics that had not yet been found, and highlight mislabelled patents. We repeated this process until all patents were labelled with at least one topic (see Appendix 5 for all topics and keywords).
